# Supplementary material for: Epstein-Barr Virus Association with Peptic Ulcer Disease
Source: Hindawi journal article supplement (doi:10.1155/2015/164840), 2015-01-01
Supplement: f1 [file 164840.f1.pdf]

**Supplementary tables**

**Supplementary table 1.** Analysis of anti-EBV IgG and inflammation.

| EBV IgG titers <sup>b</sup>     | Mononuclear cell infiltrate       |        | OR (95% CI) <sup>c</sup> |
|---------------------------------|-----------------------------------|--------|--------------------------|
|                                 | Mild-Moderate <sup>a</sup>        | Severe |                          |
|                                 | n                                 | n      |                          |
| 20.1 – 55.09                    | 8                                 | 6      | 1.0                      |
| 55.10 – 83.76                   | 5                                 | 6      | 1.3 (0.2 – 7.3)          |
| 83.77 – 181.1                   | 23                                | 10     | 0.5 (0.1 – 2.0)          |
| <i>p</i> for trend <sup>d</sup> |                                   |        | 0.226                    |
| EBV IgG titers <sup>b</sup>     | Polymorphonuclear cell infiltrate |        | OR (95% CI) <sup>c</sup> |
|                                 | Mild-Moderate <sup>a</sup>        | Severe |                          |
|                                 | n                                 | n      |                          |
| 20.1 – 55.09                    | 12                                | 2      | 1.0                      |
| 55.10 – 83.76                   | 10                                | 1      | 0.5 (0.03 – 7.1)         |
| 83.77 – 181.1                   | 28                                | 5      | 1.2 (0.2 – 8.9)          |
| <i>p</i> for trend <sup>d</sup> |                                   |        | 0.75                     |

<sup>a</sup> Used as control group.

<sup>b</sup> Units (HU/mL)

<sup>c</sup> OR and <sup>d</sup> Chi square for trend, adjusted for age and sex. Also adjusted by a robust logistic regression model.

**Supplementary table 2.** ORs estimated after eliminating patients with intestinal metaplasia.

| Serology                 | Healthy controls <sup>a</sup> | Peptic ulcer                               |                                           |
|--------------------------|-------------------------------|--------------------------------------------|-------------------------------------------|
|                          |                               | Duodenal                                   | Gastric                                   |
| N (%)                    | 129 (100)                     | 50 (100)                                   | <b>12 (100)</b>                           |
| <b>EBV IgA</b>           |                               |                                            |                                           |
| Positives, n (%)         | 22 (17.1)                     | 17 (34)                                    | <b>8 (66.7)**</b>                         |
| Negatives, n (%)         | 107 (82.9)                    | 33 (66)                                    | <b>4 (33.3)</b>                           |
| OR <sup>b</sup> (95% CI) |                               | <b>2.3 (1.01-5.3)</b><br><b>p = 0.048</b>  | <b>8.4 (2.0-35.4)</b><br><b>p = 0.003</b> |
| <b>HP IgG</b>            |                               |                                            |                                           |
| Positives, n (%)         | 77 (59.7)                     | 48 (96)                                    | 7 (58.7)                                  |
| Negatives, n (%)         | 52 (40.3)                     | 2 (4)                                      | 5 (41.3)                                  |
| OR (95% CI)              |                               | <b>11.5 (2.6-50.8)</b><br><b>p = 0.001</b> | 0.4 (0.1-1.8)<br>p = 0.216                |
| <b>HPCagA+ IgG</b>       |                               |                                            |                                           |
| Positives, n (%)         | 52 (40.3)                     | <b>38 (76)</b>                             | 3 (25)                                    |
| Negatives, n (%)         | 77 (59.7)                     | <b>12 (24)</b>                             | 9 (75)                                    |
| OR <sup>b</sup> (95% CI) |                               | <b>4.1 (1.9-8.9)</b><br><b>p = 0.0001</b>  | 0.3 (0.08-1.1)<br>p = 0.071               |

Significant differences \*( $p \leq 0.05$ ) and \*\*( $p \leq 0.001$ ).

<sup>a</sup> Used as control group.

<sup>b</sup> OR adjusted for age, sex. Also adjusted by a robust logistic regression model.
